# Supplementary material for: Correlating lignin structure to aromatic products in the catalytic fast pyrolysis of lignin model compounds containing β–O–4 linkages
Source: Royal Society of Chemistry journal article supplement (doi:10.1039/c4cy00569d), 2014-07-04
Supplement: c4cy00569d1.pdf [file c4cy00569d1.pdf]

## Supporting Information

### Correlating lignin structure to aromatic products in the catalytic fast pyrolysis of lignin model compounds containing $\beta$ -O-4 linkages

Gregory T. Neumann,<sup>a</sup> Brian R. Pimentel,<sup>a</sup> Dallas J. Rensel,<sup>a</sup> and Jason C. Hicks<sup>\*a</sup>

<sup>a</sup> 182 Fitzpatrick Hall, University of Notre Dame, Notre Dame, Indiana, 46556, USA. Fax: 574-631-8366; Tel: 574-631-5581;

\*E-mail: [jhicks3@nd.edu](mailto:jhicks3@nd.edu)

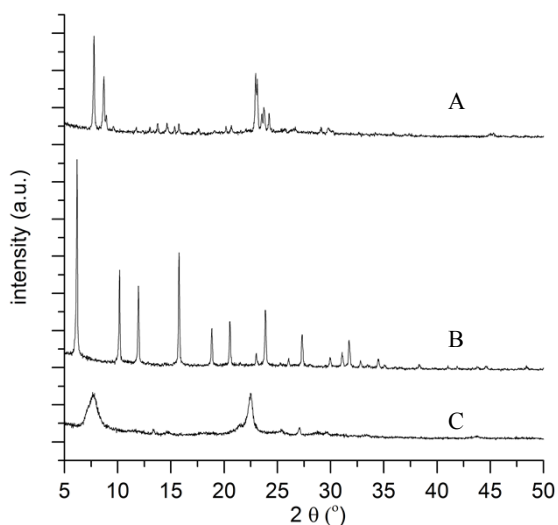

**SFigure 1** XRD patterns of A) Z23, B) ZY, and C) ZB.

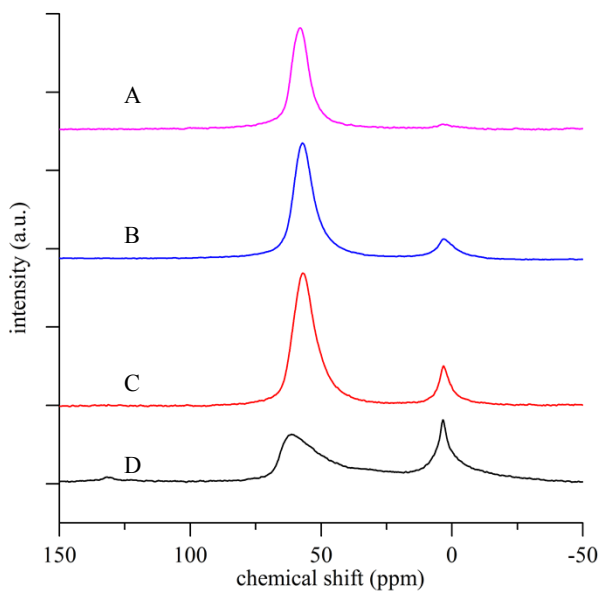

**Figure 2**  $^{27}\text{Al}$  MAS NMR of A) Z50, B) Z23, C) ZB, and D) ZY

**Table S1.** Textural properties of hierarchical materials. Adapted with permission from (G. T. Neumann and J. C. Hicks, *Crystal Growth & Design*, 2013, **13**, 1535-1542.). Copyright (2013) American Chemical Society.

| Material | $V_{\text{Total}}$<br>( $\text{cm}^3/\text{g}$ ) <sup>a</sup> | $V_{\text{micro}}$<br>( $\text{cm}^3/\text{g}$ ) <sup>b</sup> | $V_{\text{meso}}$<br>( $\text{cm}^3/\text{g}$ ) <sup>c</sup> | Total Acidity<br>( $\text{mmol}/\text{g}$ ) <sup>d</sup> | BJH Pore<br>Diameter ( $\text{\AA}$ ) | $\text{SA}_{\text{BET}}$<br>( $\text{m}^2/\text{g}$ ) |
|----------|---------------------------------------------------------------|---------------------------------------------------------------|--------------------------------------------------------------|----------------------------------------------------------|---------------------------------------|-------------------------------------------------------|
| micro    | 0.35                                                          | 0.14                                                          | 0.02                                                         | 0.19                                                     | -                                     | 410                                                   |
| 4 hr     | 0.51                                                          | 0.14                                                          | 0.32                                                         | 0.14                                                     | 57                                    | 855                                                   |
| 12 hr    | 0.50                                                          | 0.14                                                          | 0.30                                                         | 0.17                                                     | 125                                   | 588                                                   |
| 18 hr    | 0.43                                                          | 0.14                                                          | 0.25                                                         | 0.19                                                     | 250                                   | 405                                                   |
| 48 hr    | 0.37                                                          | 0.14                                                          | 0.19                                                         | 0.14                                                     | 250                                   | 385                                                   |
| 216 hr   | 0.34                                                          | 0.14                                                          | 0.16                                                         | 0.13                                                     | 370                                   | 320                                                   |
